# Supplementary material
Source: publisher site journal article supplement (https://www.dovepress.com/article/535103)
Supplement: Supplementary file 1 [file 535103%20Revised%20Supplementary%20Table%201-2.docx]

**Table S1 Primers for real-time quantitative PCR employed throughout this research**

| Gene | Forward primer (5′-3′) | Reverse primer (5′-3͊′) |
| --- | --- | --- |
| GAPDH | CCTCGTCCCGTAGACAAAATG | TGAGGTCAATGAAGGGGTCGT |
| Sirt1 | TTCAGAACCACCAAAGCGGA | TCCCACAGGAGACAGAAACCC |
| catalase | CCAGCGACCAGATGAAGCAGT | CAGGAATCCGCTCTCTGTCAA |
| FOXO1 | CGTGCATTCCCTGGTGTATCC | GGCGGTGCAAACGAATAGC |
| Mn-SOD | TCCCAGACCTGCCTTACGACT | CCCTTAGGGCTCAGGTTTGTC |

**Table S2** **The change of general indicators after 4MR treatment**

| Indicators | CON (n = 10) | HFD (n = 10) | HFD + 4MR (n = 10) |
| --- | --- | --- | --- |
| HDL-C(mmol/L)  LDL-C(mmol/L)  TC(mmol/L)  TG(mmol/L)  FBG(mmol/L)  Insulin(ng/ml)  QUICKI | 3.27 ± 0.21  0.18 ± 0.05  5.76 ± 0.46  0.53 ± 0.05  6.38 ± 0.72  0.32 ± 0.09  0.65 ± 0.06 | 2.19 ± 0.17*  0.98 ± 0.15*  8.45 ± 0.55*  1.53 ± 0.12*  13.1 ± 1.46*  1.39 ± 0.13*  0.40 ± 0.01* | 2.73 ± 0.20#  0.88 ± 0.13  7.36 ± 0.49#  1.08 ± 0.11#  8.44 ± 1.14#  0.50 ± 0.11#  0.54 ± 0.03# |
